# Supplementary material
Source: Springer Nature journal article supplement (https://www.springermedizin.de/resource/supplementary/12889_2009_2171_MOESM1_ESM.pdf/9484836)

### Total mortality

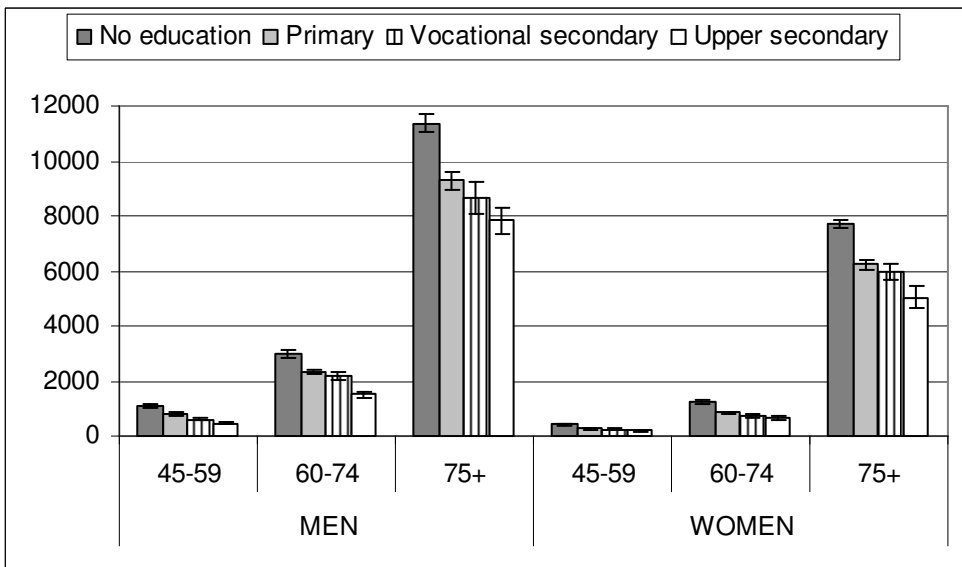

### Total cancer mortality

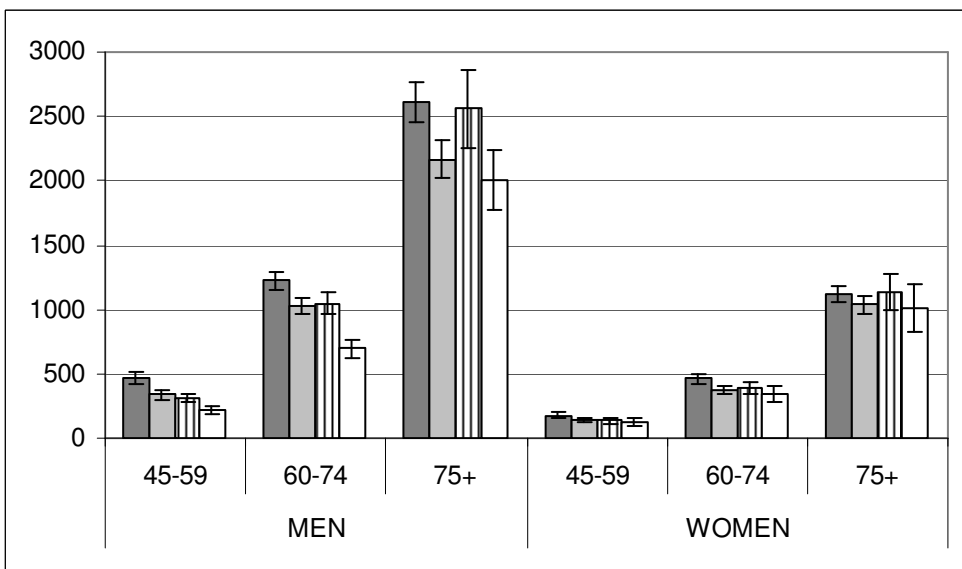

### Total cardiovascular mortality

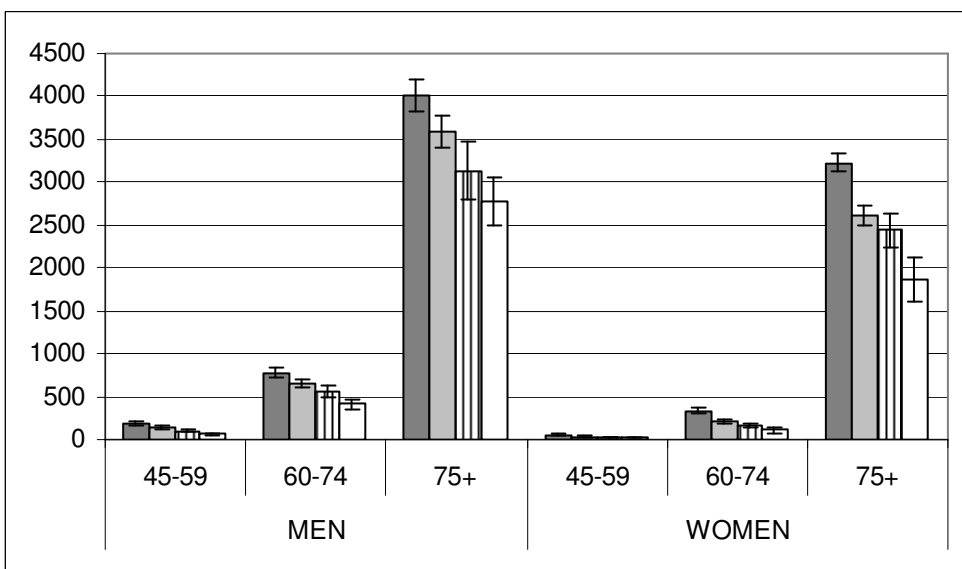

Supplement: MOESM1 [file 9484836]
